# Supplementary material for: Modeling the Potential Global Distribution of Honeybee Pest, Galleria mellonella under Changing Climate
Source: MDPI journal article supplement (doi:10.3390/insects13050484), 2022-05-22

**Figures S2:** Response curves of the most relevant environmental factors affecting the distribution of the greater wax moth (GWM), *Galleria mellonella*; the shown values are average of ten replicate runs.

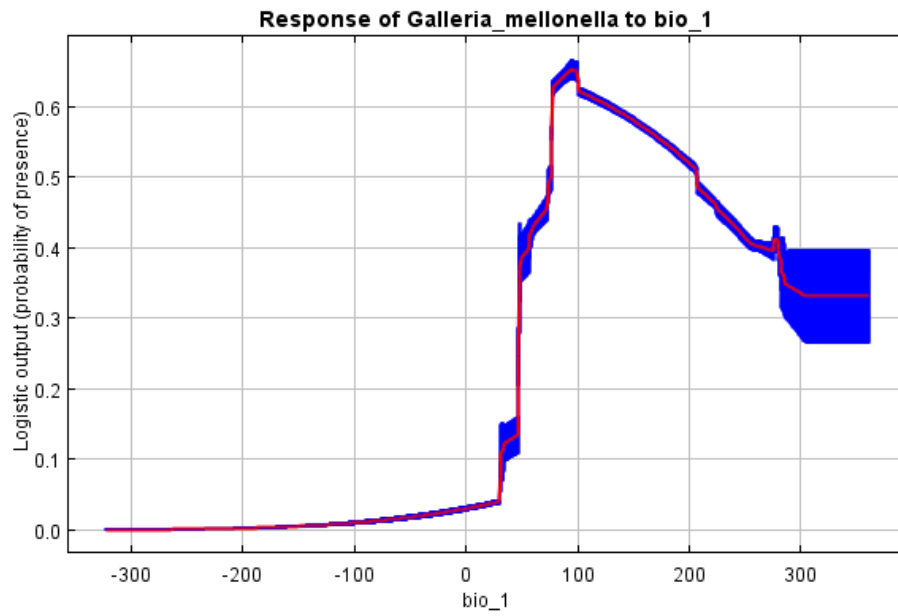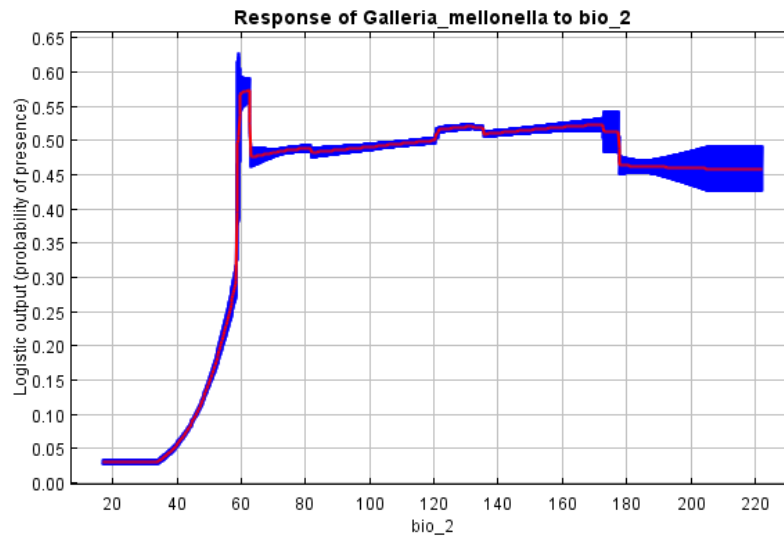

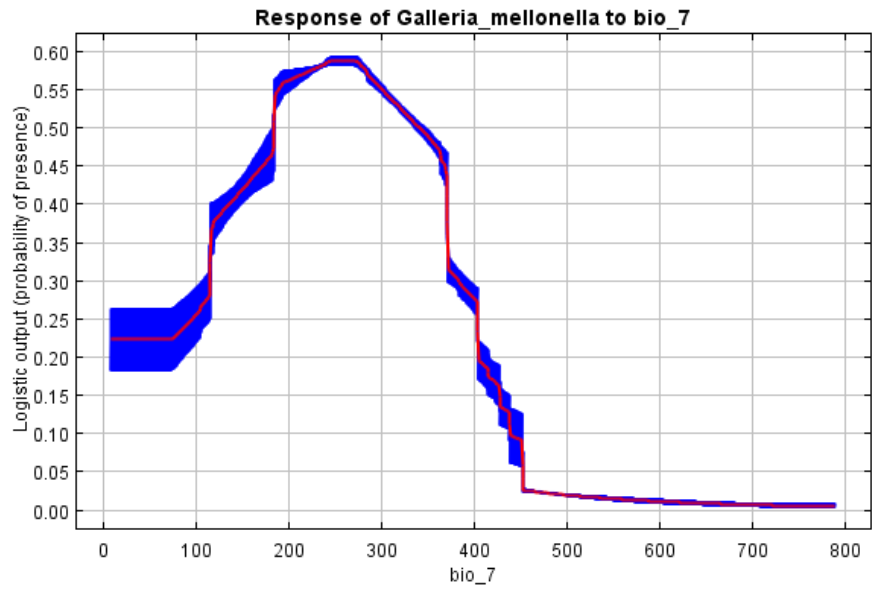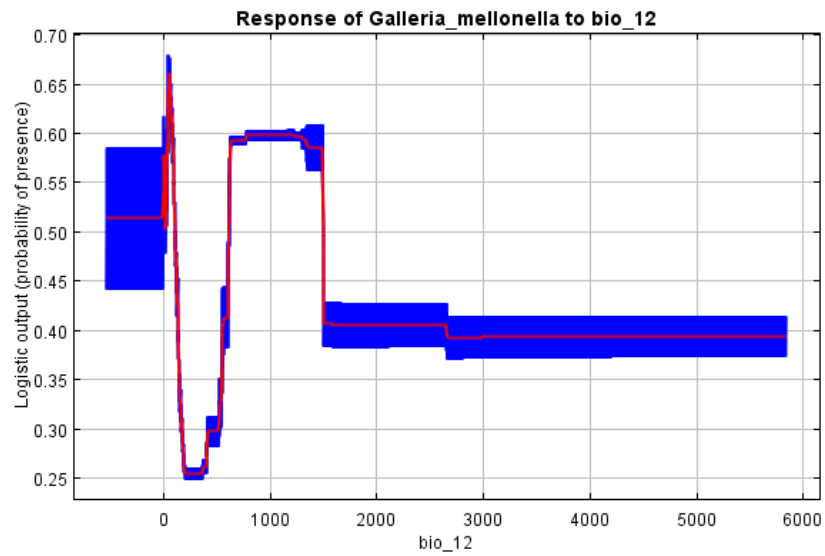

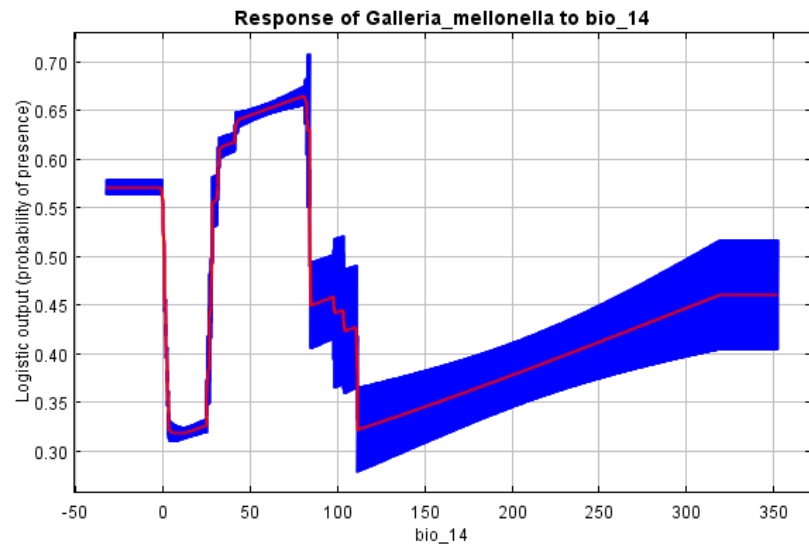

Supplement: s1 [file s1]
