# Supplementary material for: Modeling the Potential Global Distribution of Honeybee Pest, Galleria mellonella under Changing Climate
Source: MDPI journal article supplement (doi:10.3390/insects13050484), 2022-05-22

**Figure S1:** The receiver operating characteristic (ROC) curve for Greater wax moth (GWM), *Galleria mellonella*

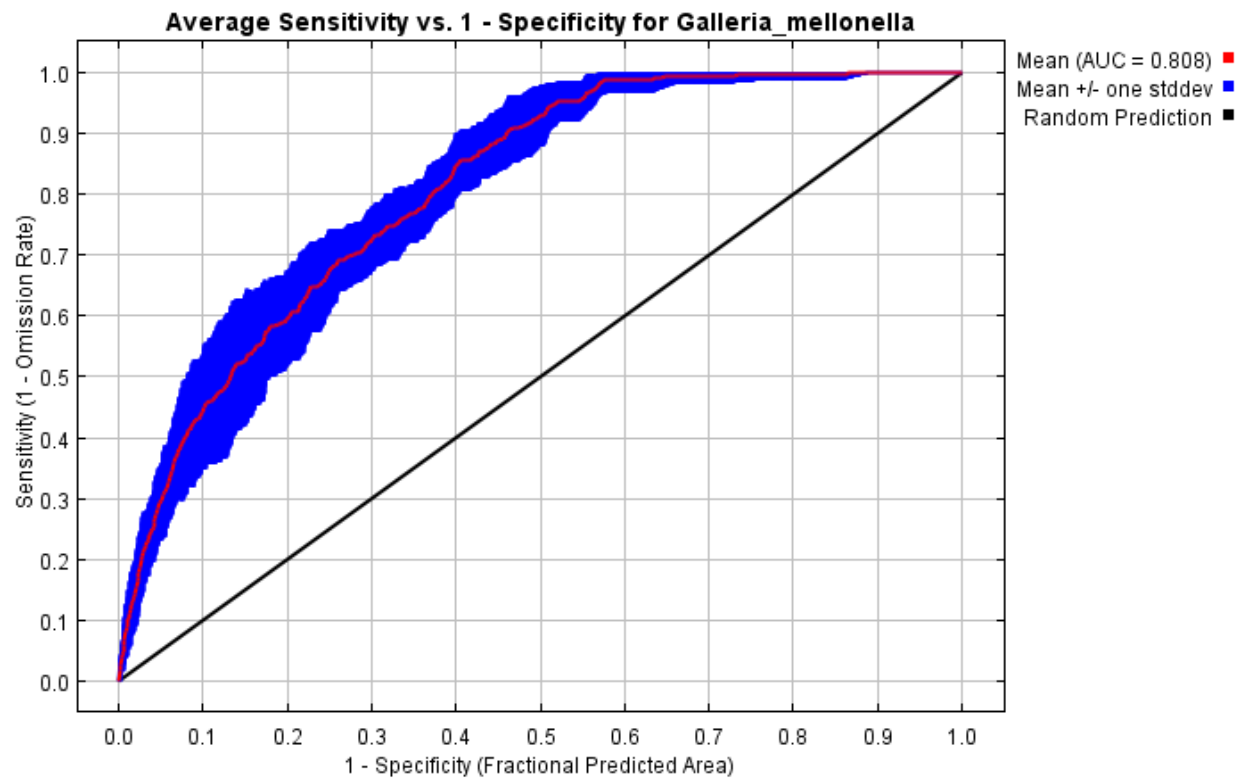

Supplement: s1 [file s1]
